# Supplementary material for: Intravital imaging with two-photon microscopy reveals cellular dynamics in the ischeamia-reperfused rat heart
Source: PubMed Central journal article supplement (PMC6207786; doi:10.1038/s41598-018-34295-w), 2018-10-30
Supplement: 41598_2018_34295_MOESM1_ESM.pdf [file 41598_2018_34295_MOESM1_ESM.pdf]

1 *Scientific Reports*

2 **Supplementary Information**

3

4 **Intravital imaging with two-photon microscopy reveals cellular dynamics in the ischemia-**  
5 **reperfused rat heart**

6

7 Ryohei Matsuura<sup>1</sup>, Shigeru Miyagawa<sup>1</sup>, Satsuki Fukushima<sup>1</sup>, Takasumi Goto<sup>1</sup>, Akima  
8 Harada<sup>1</sup>, Yuri Shimozaki<sup>3</sup>, Kazumasa Yamaki<sup>3</sup>, Sho Sanami<sup>3</sup>, Junichi Kikuta<sup>2</sup>, Masaru Ishii<sup>2</sup>,  
9 Yoshiki Sawa<sup>1</sup>

10

11 <sup>1</sup>Department of Cardiovascular Surgery, Osaka University Graduate School of Medicine,  
12 Osaka, Japan

13 <sup>2</sup>Department of Immunology and Cell Biology, Osaka University Graduate School of  
14 Medicine, Osaka, Japan

15 <sup>3</sup>Research and Development Division for Advanced Technology, Research and Development  
16 Center, Dai Nippon Printing Co., Ltd., Tokyo, Japan

17

18

19 **Figure 1**

20 (a) **Longitudinal two-photon imaging of the beating heart.** Time-measurement of GFP  
21 intensity in Longitudinal two-photon imaging of the beating heart in the GFP Lewis rat  
22 stabilized for 5 hours and recorded at regular intervals for a total of 5 minutes of  
23 irradiation. The graph indicates the recording was performed without photobleaching. (see  
24 Video 1)

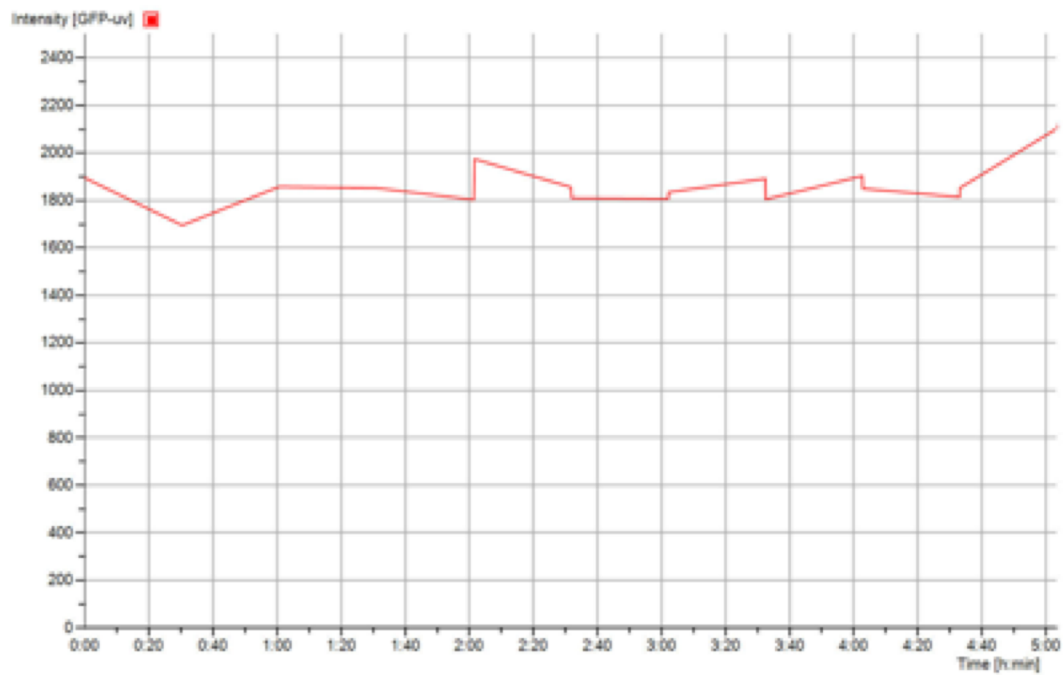

25

26

27 (b) **Images of normal GFP rat heart and intensities of each channel.** Images of normal GFP rat  
28 heart were collected using two photon microscopy, without administrating any staining solutions  
29 at 840 nm (Video 1). Scale bar, 50  $\mu\text{m}$ . The graph shows that intensities in the GFP normal  
30 cardiac tissue were achieved for green signal and green bleed-through in the red and blue channel.

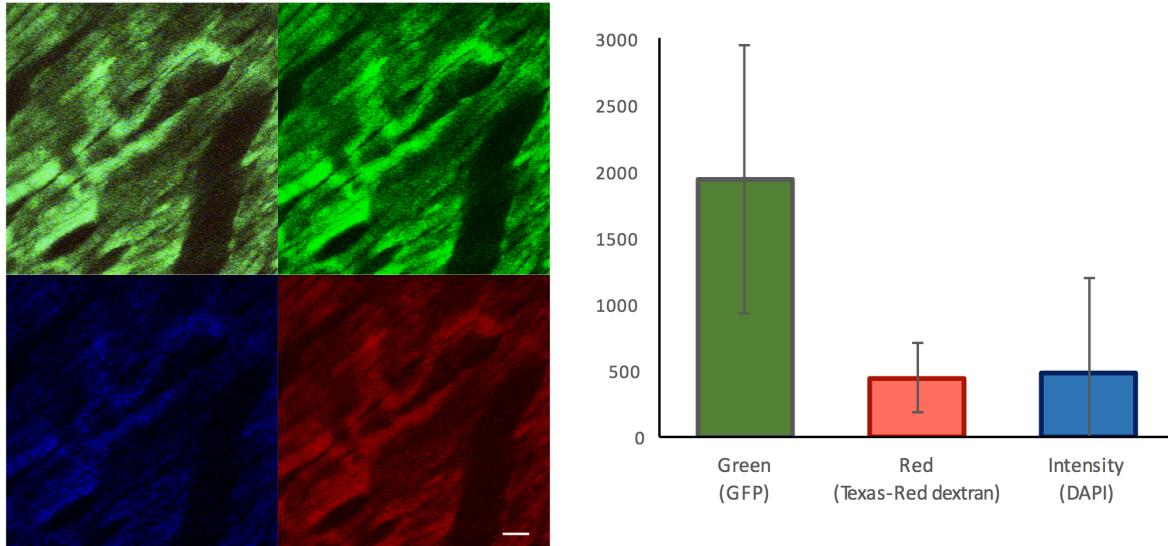

31  
32

33 **Figure 2**

34 **The velocity measurement of leukocyte flowing in Ischemia/Reperfusion zone on the**  
35 **Video 10.** Four leukocytes labelled by GFP were identified and tracked frame by frame. The  
36 numbers plotted on each graph are the elapsed times (msec). White arrows in each sequential  
37 images are one of the leukocytes.

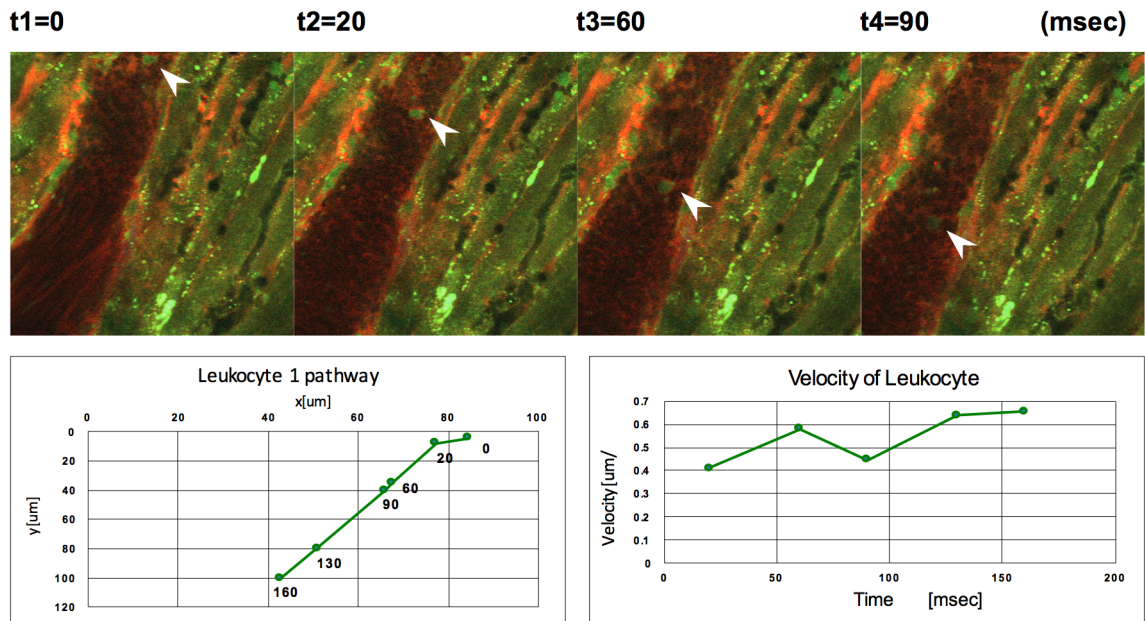

38

39

40 **Figure 3, Video 13**

41 **Myocardial tissue stained with TMRE in the arrested heart of GFP Lewis rat.** The right

42 and bottom images are each cross-sectional views of the myocardial tissue. Scale bar: 100  $\mu\text{m}$ .

43 Z-stack was used as experimental loop for output timing parameter.

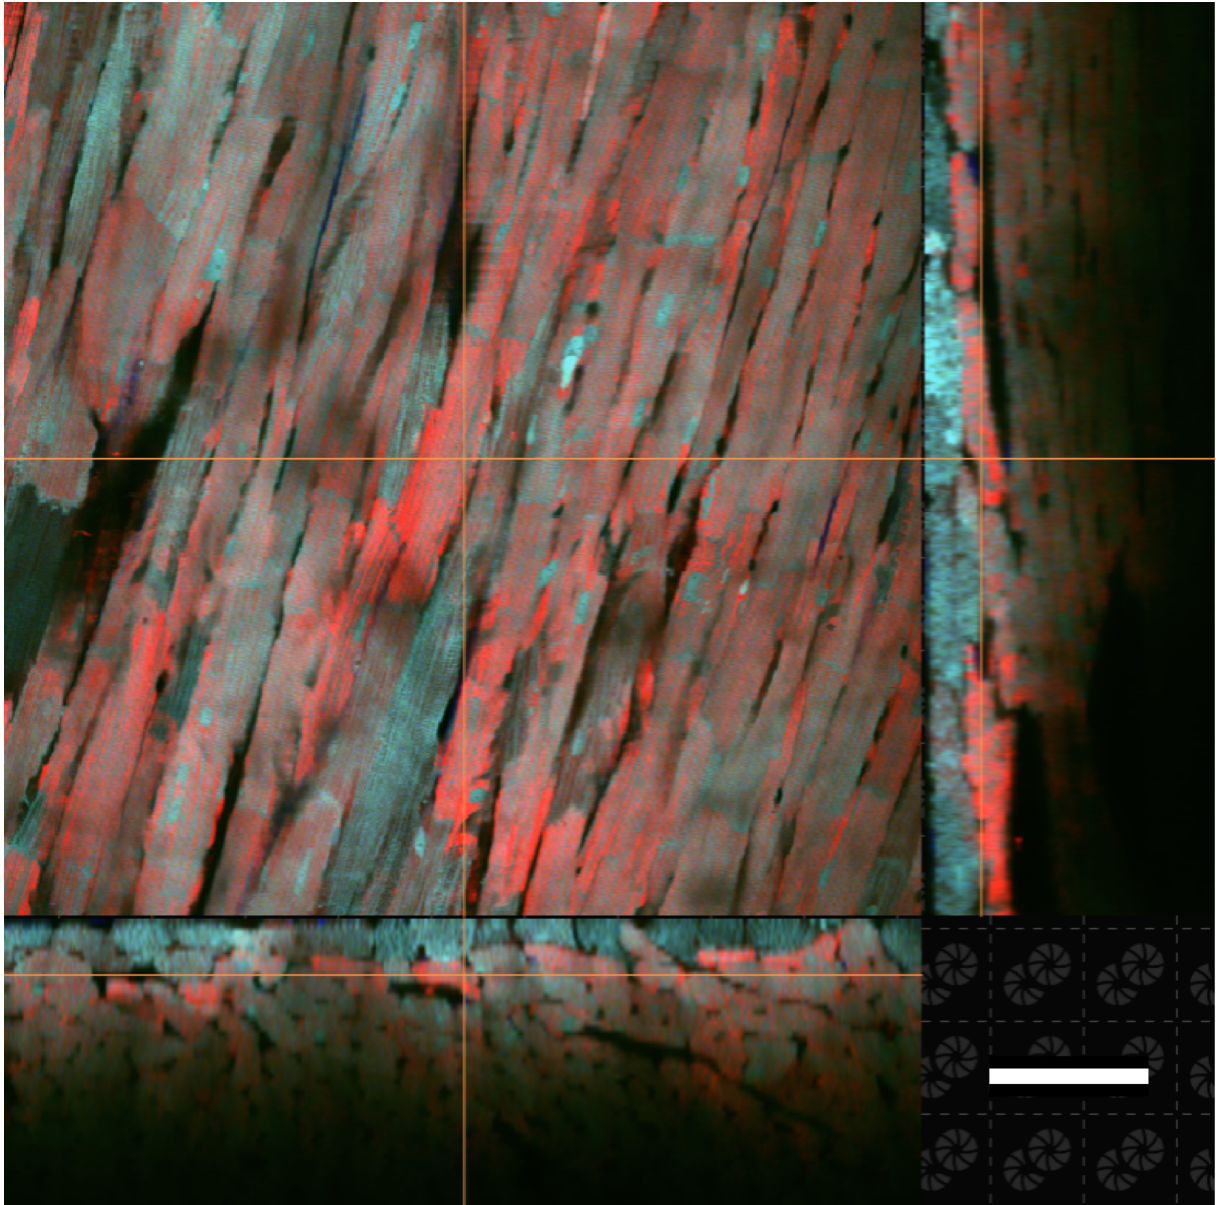

44

45

46

47 **Figure 4, Video 14**

48 **Three dimensional imaging of myocardial tissue stained with TMRE in the beating heart**

49 **of GFP Lewis rat at 0.24 frames/second.**

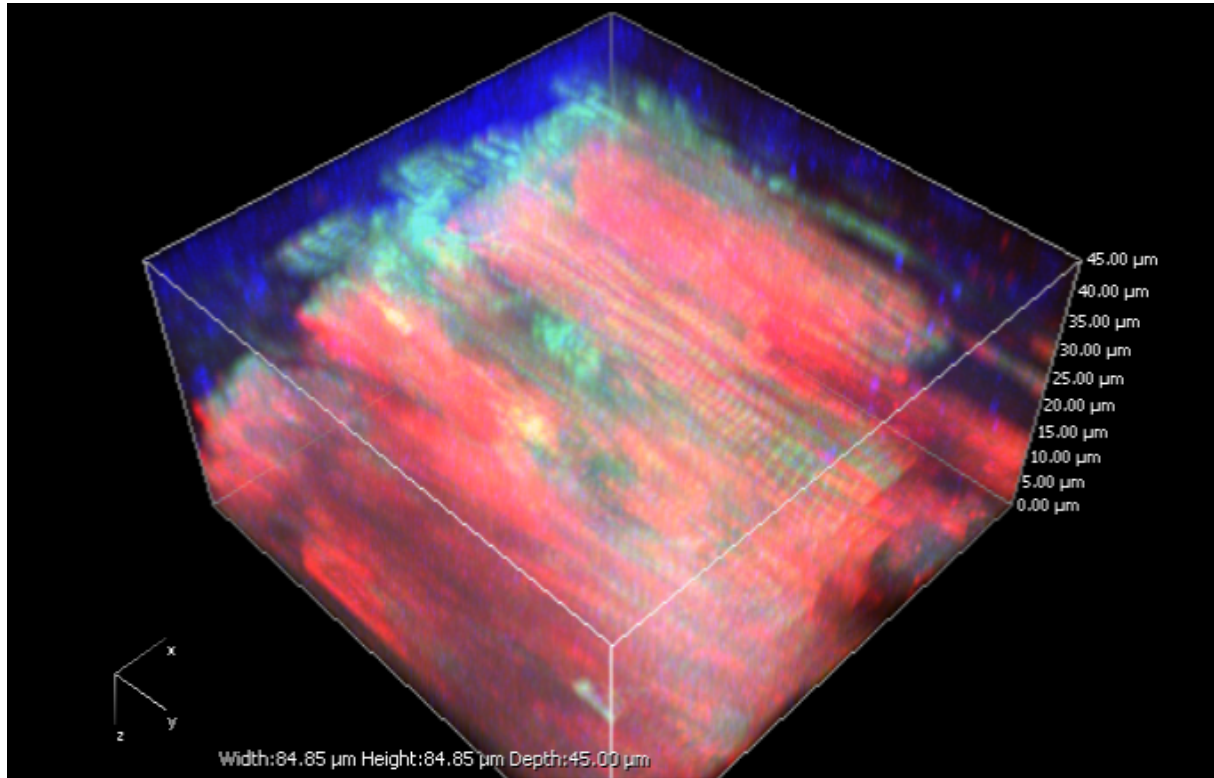

50

51

52

53 **Video 1** Longitudinal two-photon imaging of the beating heart in the GFP Lewis rat.  
54 Sequential images in the same visual field were acquired every 30 minutes for 5 hours at 15  
55 fps. (see Fig. 1c)

56 **Videos 2 and 3.** Intravital two-photon imaging of cardiac myocytes in GFP-transgenic Lewis  
57 rats (Videos 2, 3). Sequential images in the same visual field were acquired 10 min after  
58 intravenous injection of isolectin B4 (10 mg/kg) (Video 2), or 70-kDa dextran conjugated  
59 with Texas Red (10 mg/kg) (Video 3). GFP-positive myocytes can be seen in green. The  
60 capillary endothelium cells were also visualised by intravenous injection of Texas Red-  
61 dextran -conjugated isolectin B4 (red). The blood flow in the microvasculature was visualized  
62 by monitoring Texas Red-dextran fluorescence. Scale bars, 25  $\mu\text{m}$  (Video 2), 10 $\mu\text{m}$  (Video 3).  
63 Frames were acquired consecutively at 15 frames/s. The playback speed is real-time.

64

65 **Video 4.** Analysis of the motion of normal cardiomyocytes was facilitated by stabilisation of  
66 the beating heart image by linear alignment, non-linear registration, and measurement of  
67 inter-pixel distances between corresponding points in the first frame and each subsequent  
68 frame of Video 2.

69

70 **Video 5.** Intravital two-photon imaging of cardiac myocytes in a GFP-transgenic Lewis rat.  
71 Sequential images in the same visual field were acquired 10 min after intravenous injection of  
72 TMRE (10 mg/kg) and 10 kDa Cascade Blue-conjugated dextran (60 mg/kg). A GFP-positive  
73 sarcomere can be seen in green. The distribution of mitochondria around the sarcomere was  
74 also visible. The blood flow in the microvasculature was visualized by blue-labelled dextran.  
75 Scale bar, 100  $\mu\text{m}$ . Frames were acquired consecutively at 15 frames/s. The playback speed is  
76 real-time.

77

78 **Videos 6 and 7.** The difference in motions between high- and low-intensity patches were  
79 analysed using a video-processing program and an injured heart. Red, isolectin B4; green,  
80 GFP; blue, blue-labelled dextran; red, TMRE; scale bar, 20  $\mu\text{m}$ . Frames were acquired  
81 consecutively at 15 frames/s. The playback speed is real-time.

82

83 **Videos 8 and 9.** Consequences of the ischaemia/reperfusion protocol. Intravital two-photon  
84 imaging of a period of ischaemia and reperfusion in a GFP-transgenic Lewis rat. Feature  
85 tracking of an arbitrary point (orange point) was used to determine the amplitude of the  
86 beating heart (Video 8). GFP-positive myocytes can be seen in green. The blood flow in the  
87 microvasculature was visualized by Texas Red-dextran. Scale bar, 100  $\mu\text{m}$ . Frames were  
88 acquired consecutively at 15 frames/s. The playback speed is real-time.

89

90 **Videos 10 and 11.** Intravital two-photon imaging after completing a prolonged I/R protocol in  
91 a GFP-transgenic Lewis rat. Green, GFP; red, red-labelled dextran; scale bar, 100  $\mu\text{m}$ . Frames  
92 were acquired consecutively at 15 frames/s. The playback speed is real time.

93

94 **Video 12.** Intravital two-photon imaging after completing a 30 min/30 min I/R protocol in a  
95 BMT Wistar rat. Red, red-labelled dextran; Green, GFP; Blue, Second Harmonic Generation,  
96 scale bar, 100  $\mu\text{m}$ . Frames were acquired consecutively at 15 frames/s. The playback speed is  
97 real time.

98
